# Supplementary material
Source: PubMed Central journal article supplement (PMC8939320)
Supplement: aem.02323-21-s0001.pdf [file aem.02323-21-s0001.pdf]

# **A novel method to create efficient phage cocktails via use of phage-resistant bacteria**

**Chengcheng Li<sup>1,2</sup>, Tongmei Shi<sup>1,2</sup>, Yuechao Sun<sup>1</sup>, Yongyu Zhang<sup>1,2,3,4\*</sup>**

<sup>1</sup> Key Laboratory of Biofuels, Shandong Provincial Key Laboratory of Energy Genetics, Qingdao Institute of Bioenergy and Bioprocess Technology, Chinese Academy of Sciences, Qingdao 266101, China

<sup>2</sup> University of Chinese Academy of Sciences, Beijing 100049, China

<sup>3</sup> Shandong Energy Institute, Qingdao, 266101, China

<sup>4</sup> Qingdao New Energy Shandong Laboratory, Qingdao, 266101, China

\* Correspondence: zhangyy@qibebt.ac.cn (Y.Z.); Tel.: +86-532-80662680 (Y.Z.)

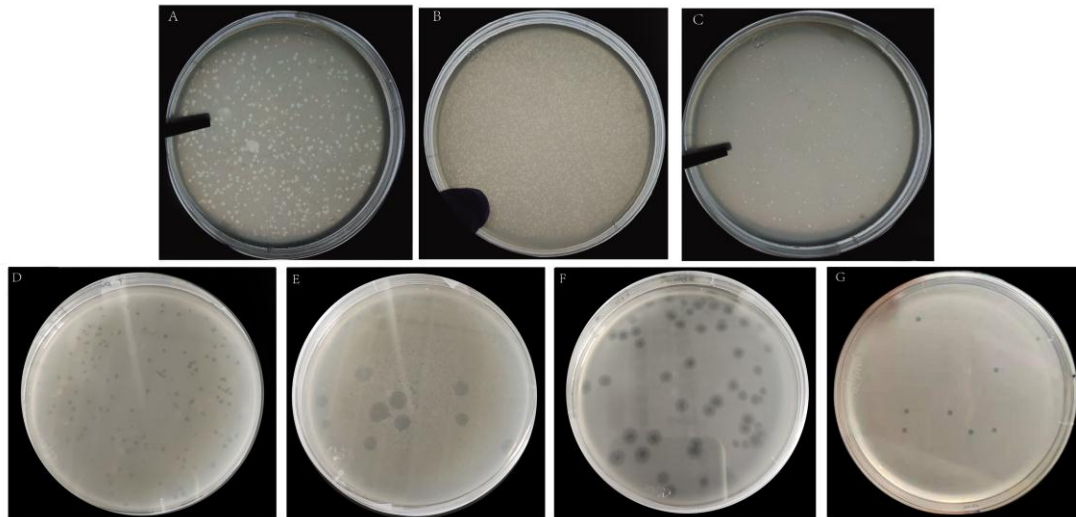

Fig. S1 Phage plaques of Va1 (A), Va2 (B), Va3 (C), VP1 (D), VP2 (E), VP3 (F), and VP4 (G) formed in double-layer agar plates.

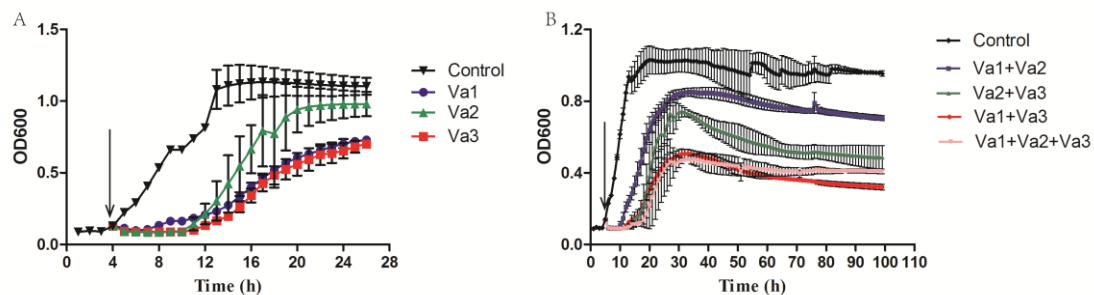

Fig. S2 Growth curves of (A) *V. alginolyticus* 283T infected by Va1, Va2, and Va3 alone and (B) combinations of these three phages at an MOI = 10. These experiments were performed simultaneously with that in Figure 4A and 4B, therefore their control was same. **The arrows indicate the time point when the phages were added in the bacterial medium.** The data are shown as mean  $\pm$  SD, and the *P*-values (calculated by one-way ANOVA and Student's *t*-test) are shown in Table S8-S9.

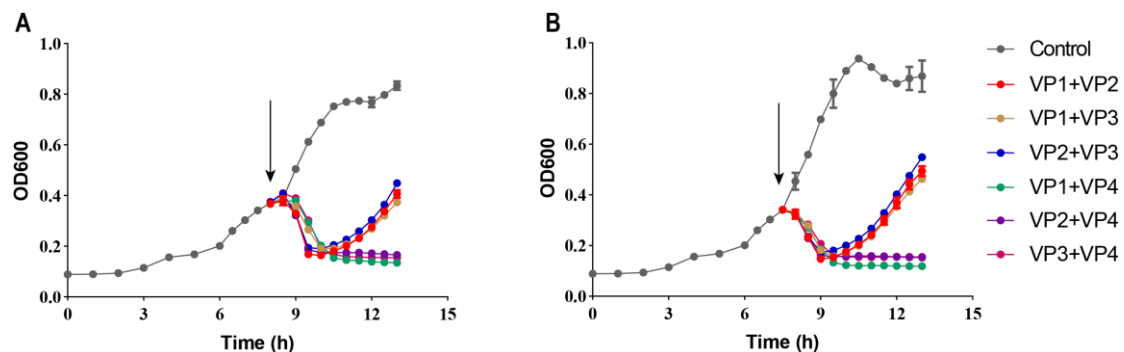

Fig. S3 The growth curves of *Vibrio parahaemolyticus* MCS (VP) infected by the combination of phages VP1, VP2, VP3, and VP4 at MOIs of 1 (A) and 10 (B). VP1, VP2, and VP3 were isolated using the wild strain (*Vibrio parahaemolyticus* MCS), and VP4 was isolated using a mutant strain evolved under the stress of VP1. The arrows indicate the time point when the phages were added in the bacterial medium. The data are shown as mean  $\pm$

SD, and the *P*-values (calculated by one-way ANOVA and Student's *t*-test) are shown in Table S10-S11.

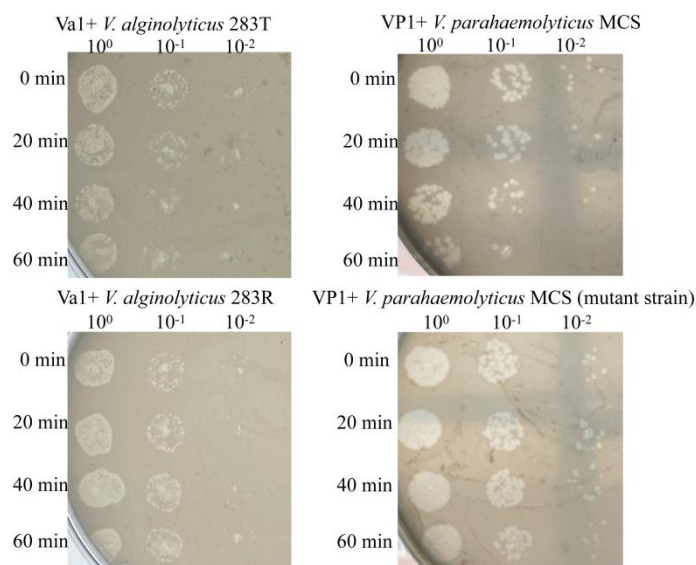

Figure S4. Phage adsorption assay. When the host bacteria grew to the early exponential phase, phages were added to the culture at MOI 0.01. Samples were taken at the indicated time points and the number of extracellular phages were determined by spot assay. The decreased number of extracellular phages over time (eg. Va1 + *V. alginolyticus* 283T and VP1 + *V. parahaemolyticus* MCS) revealed that phages gradually adsorbed to the host. While the unchanged number of extracellular phages (eg. Va1 + *V. alginolyticus* 283R and VP1 + *V. parahaemolyticus* MCS mutant strain) indicated that phages failed to adsorb to the host.

Table S1 Functionally-annotated ORFs of the genome of phage Va1.

| ORF no. | Best hit organism            | Accession No.  | E value   | Identity(%) | Putative Product                                                        |
|---------|------------------------------|----------------|-----------|-------------|-------------------------------------------------------------------------|
| 10      | Acinetobacter tandoii        | WP_016166803.1 | 1.55E-65  | 45.349      | protease SohB                                                           |
| 21      | Sulfurovum sp. NBC37-1       | WP_083760521.1 | 1.46E-30  | 53          | DUF2493 domain-containing protein                                       |
| 28      | Capnocytophaga gingivalis    | WP_002670075.1 | 0         | 65.546      | anaerobic ribonucleoside-triphosphate reductase                         |
| 29      | Capnocytophaga sp. H2931     | WP_095893997.1 | 1.14E-36  | 46.207      | anaerobic ribonucleoside-triphosphate reductase activating protein      |
| 39      | Clostridium scatologenes     | WP_029159783.1 | 2.94E-74  | 36.658      | adenylosuccinate synthase                                               |
| 40      | Vibrio phage PWH3a-P1        | YP_007675972.1 | 8.01E-63  | 53.591      | exonuclease                                                             |
| 55      | Pseudoalteromonas sp. TMED43 | OUX93577.1     | 1.84E-75  | 78.358      | glycerol-3-phosphate cytidyltransferase                                 |
| 60      | uncultured Clostridium sp.   | SCG88662.1     | 5.19E-22  | 46.465      | Thioredoxin                                                             |
| 65      | Clostridium                  | WP_042396253.1 | 4.31E-54  | 46.073      | MULTISPECIES: ATP-dependent Clp endopeptidase, proteolytic subunit ClpP |
| 95      | Campylobacter virus CP21     | YP_007005208.1 | 2.51E-75  | 42.208      | putative sliding clamp loader (T4-like DNA polymerase accessory factor) |
| 101     | Campylobacter virus CP220    | YP_009169249.1 | 6.67E-86  | 33.766      | Possible phage DNA polymerase                                           |
| 103     | Sinorhizobium phage phiN3    | YP_009212557.1 | 3.19E-10  | 27.57       | MobE homing endonuclease                                                |
| 105     | Campylobacter virus CP220    | YP_009169249.1 | 3.59E-76  | 43.119      | Possible phage DNA polymerase                                           |
| 113     | Campylobacter phage PC5      | ANH51266.1     | 4.10E-08  | 27.966      | putative clamp loader subunit                                           |
| 121     | Deferribacter desulfuricans  | WP_013008544.1 | 2.36E-06  | 26.49       | phosphoesterase                                                         |
| 130     | Campylobacter virus CPt10    | YP_009169066.1 | 1.95E-114 | 43.077      | Possible phage ATP-dependent primase-helicase                           |
| 136     | Campylobacter virus CP21     | YP_007005197.1 | 2.09E-64  | 48.4        | putative terminase (T4 gp17-like)                                       |
| 137     | Campylobacter virus CPt10    | YP_009168939.1 | 1.01E-61  | 49.289      | Putative phage DNA packaging protein (terminase)                        |

|     |                                  |                |           |        |                                                    |
|-----|----------------------------------|----------------|-----------|--------|----------------------------------------------------|
| 145 | Escherichia phage 4MG            | YP_008857319.1 | 1.51E-88  | 48.355 | putative RNA ligase 1/tail attachment protein      |
| 153 | Shewanella sp. phage 1/4         | YP_009100402.1 | 1.38E-138 | 47.797 | multifunctional tRNA nucleotidyl transferase       |
| 171 | Vibrio phage nt-1                | YP_008125493.1 | 2.11E-46  | 58.784 | gp36+37 fusion long tail fiber distal subunit      |
| 173 | Campylobacter virus CPt10        | YP_009169114.1 | 1.97E-35  | 37.727 | Possible phage tail sheath completion protein      |
| 175 | Campylobacter virus IBB35        | AEI88223.1     | 3.63E-81  | 36.638 | gp39 topoisomerase II                              |
| 180 | Campylobacter virus IBB35        | AEF56840.1     | 4.21E-89  | 39.002 | gp52 DNA topoisomerase II                          |
| 184 | Arcobacter anaerophilus          | WP_044419043.1 | 1.72E-138 | 46.482 | phosphate starvation protein PhoH                  |
| 186 | Vibrio sinaloensis               | WP_008072846.1 | 1.08E-50  | 43.925 | serine protease                                    |
| 190 | Campylobacter virus CP21         | YP_007005117.1 | 1.48E-112 | 52.848 | MreB-like ATPase protein                           |
| 198 | Campylobacter virus CPt10        | YP_009169063.1 | 2.47E-32  | 33.028 | Possible sliding clamp                             |
| 199 | Campylobacter virus IBB35        | AEF56815.1     | 2.50E-85  | 47.5   | gp32 single-stranded DNA binding protein           |
| 200 | Campylobacter virus CP21         | YP_007005209.1 | 1.23E-73  | 40.663 | putative RNaseH                                    |
| 202 | Campylobacter virus CP220        | YP_009169143.1 | 5.67E-44  | 31.285 | Putative DNA primase subunit                       |
| 209 | Tenacibaculum phage pT24         | BAV39295.1     | 3.98E-12  | 64.706 | DNA ligase 1                                       |
| 210 | Enterobacter cloacae             | WP_084833038.1 | 1.44E-32  | 58.763 | transcriptional regulator                          |
| 226 | Campylobacter virus IBB35        | AEF56843.1     | 2.68E-105 | 40.443 | DNA helicase UvsW                                  |
| 234 | Clostridium paraputrificum       | WP_027097998.1 | 4.46E-16  | 32.973 | restriction endonuclease subunit M                 |
| 235 | Mycoplasma iowae                 | WP_004025021.1 | 9.92E-112 | 50.294 | ribonucleoside-diphosphate reductase subunit beta  |
| 236 | Mycoplasma iowae                 | WP_004025022.1 | 0         | 54.594 | ribonucleoside-diphosphate reductase subunit alpha |
| 243 | Mitsuaria chitosanitabida        | WP_084453285.1 | 7.49E-24  | 35.795 | class I SAM-dependent methyltransferase            |
| 249 | Sulfuricurvum sp. PC08-66        | KIM11589.1     | 2.19E-07  | 31.818 | molecular chaperone GroES                          |
| 253 | Campylobacter virus IBB35        | AEI88261.1     | 6.79E-34  | 30.672 | gp13 neck protein                                  |
| 254 | Rhizobium phage<br>vB_RleM_P10VF | YP_009099829.1 | 9.10E-31  | 45.794 | head completion protein                            |
| 256 | Campylobacter virus IBB35        | AEI88197.1     | 4.03E-126 | 44.737 | gp20 portal vertex protein of head                 |
| 258 | Campylobacter virus CPX          | YP_004956875.1 | 5.68E-151 | 42.284 | gp18 tail sheath protein                           |

|     |                                  |                |           |        |                                                   |
|-----|----------------------------------|----------------|-----------|--------|---------------------------------------------------|
| 259 | Vibrio tritonius                 | WP_068716942.1 | 0         | 65.326 | chaperonin GroEL                                  |
| 260 | Campylobacter virus IBB35        | AEI88177.1     | 1.11E-28  | 30.888 | gp19 tail tube protein                            |
| 261 | Campylobacter virus CP220        | YP_009169309.1 | 3.73E-63  | 42.629 | Possible phage tail tube protein                  |
| 262 | Campylobacter virus CPt10        | YP_009168994.1 | 2.89E-62  | 48.187 | Possible phage tail tube protein                  |
| 264 | Campylobacter virus CP21         | YP_007005136.1 | 4.77E-38  | 44.304 | putative DNA end protector protein (T4 gp02-like) |
| 266 | Campylobacter virus CP220        | YP_009169327.1 | 1.72E-69  | 66.867 | Probable phage prohead core protein precursor     |
| 267 | Campylobacter virus CP220        | YP_009169184.1 | 7.98E-14  | 37.5   | Possible prohead core scaffold protein            |
| 268 | Campylobacter virus IBB35        | AEF56742.1     | 1.53E-146 | 50.216 | gp23 major capsid protein                         |
| 269 | Klosneuvirus KNV1                | ARF12305.1     | 1.07E-30  | 40.102 | csr/MutH/archaeal HJR family nuclease             |
| 271 | Paenibacillus sp. oral taxon 786 | WP_009226174.1 | 4.04E-24  | 34.483 | dihydrofolate reductase                           |
| 273 | Neptuniibacter caesariensis      | WP_007021383.1 | 4.28E-149 | 69.55  | thymidylate synthase                              |
| 274 | Chrysiogenes arsenatis           | WP_051321624.1 | 1.24E-19  | 35.714 | DUF1353 domain-containing protein                 |
| 277 | Campylobacter virus CPt10        | YP_009168940.1 | 2.90E-12  | 26.749 | Putative base plate hub assembly catalyst         |
| 278 | Campylobacter phage PC5          | ANH51291.1     | 1.37E-19  | 33.854 | putative peptidase                                |
| 279 | Campylobacter virus IBB35        | AEF56804.1     | 3.53E-14  | 25.926 | gp48 T4-like baseplate tail tube cap              |
| 284 | Campylobacter virus IBB35        | AEI88187.1     | 8.53E-15  | 37.374 | gp25 baseplate wedge subunit                      |
| 285 | Campylobacter virus CPX          | YP_004957005.1 | 1.19E-80  | 30.866 | putative baseplate wedge protein                  |
| 289 | Campylobacter virus NCTC12673    | YP_004421661.1 | 2.48E-11  | 25.166 | gp3 tail completion and sheath stabilizer protein |
| 293 | Proteus phage PM16               | YP_009147859.1 | 9.97E-14  | 35.659 | putative DNA endonuclease VII                     |
| 319 | Enterobacteria phage T4          | NP_049745.2    | 1.26E-50  | 45.57  | SegB homing endonuclease                          |

Table S2. Functionally-annotated ORFs of the genome of phage Va2.

| ORF no. | Best hit organism | Accession No. | E value | Identity(%) | Putative Product |
|---------|-------------------|---------------|---------|-------------|------------------|
|---------|-------------------|---------------|---------|-------------|------------------|

|    |                                       |                     |          |      |                                                     |
|----|---------------------------------------|---------------------|----------|------|-----------------------------------------------------|
| 1  | Vibrio phage RYC                      | ADX89528.1          | 2.4e-216 | 54.2 | Anaerobic nucleoside diphosphate reductase          |
| 6  | Capnocytophaga sp. H2931              | AUR83180.1          | 7.1e-124 | 45.4 | Helicase superfamily 1/2 ATP-binding domain protein |
| 8  | Acinetobacter guillouiae              | AUR83013.1          | 1.5e-165 | 35.0 | Coil containing protein                             |
| 10 | Saudi moumouvirus                     | AUR83031.1          | 1.4e-123 | 41.7 | P-loop containing nucleoside triphosphate hydrolase |
| 14 | Desulfocapsa sulfexigens              | WP_039458044        | 6.3e-19  | 31.1 | SDR family oxidoreductase                           |
| 15 | Yersinia phage phiR1-37               | WP_020404777        | 4.4e-15  | 31.3 | SDR family oxidoreductase                           |
| 16 | Verrucomicrobia bacterium 61-8        | WP_071216967        | 6.4e-14  | 36.3 | ribonuclease HI family protein                      |
| 23 | Alphaproteobacteria bacterium TMED194 | AUR83174.1          | 7.0e-145 | 45.2 | Terminase large subunit                             |
| 27 | Vibrio phage jenny 12G5               | AUR83170.1          | 3.1e-113 | 47.6 | Major capsid protein                                |
| 31 | Vibrio phage S4-7                     | AUR83162.1          | 5.8e-35  | 42.6 | SWIM-type zinc finger protein                       |
| 36 | Vibrio nigripulchritudo               | AUR83155.1          | 1.7e-147 | 41.6 | Tail sheath protein                                 |
| 40 | Sinorhizobium phage phiN3             | AXY86112.1          | 9.6e-37  | 40.4 | Putative glycoside hydrolase                        |
| 44 | Pseudoalteromonas phage H103          | CP035107_389        | 2.9e-10  | 31.9 | Rhs element Vgr protein                             |
| 46 | Aureimonas ureilytica                 | WP_091362230        | 8.7e-11  | 42.1 | type VI secretion system PAAR protein               |
| 52 | Campylobacter virus CPt10             | AUR83137.1          | 1.6e-7   | 47.1 | Cold-shock DNA-binding domain protein               |
| 53 | Vibrio phage eugene 12A10             | AUR83178.1          | 7.7e-12  | 33.1 | Beta-like DNA polymerase                            |
| 60 | Vibrio phage qdvp001                  | SCN43224.1          | 1.5e-2   | 25.7 | YD repeat                                           |
| 63 | Candidatus Pelagibacter sp. TMED203   | PWB34328.1          | 6.7e-3   | 29.2 | Thioredoxin                                         |
| 65 | Vibrio phage eugene 12A10             | EMBL:AUR83119<br>.1 | 8.3e-153 | 46.9 | P-loop containing nucleoside triphosphate hydrolase |
| 74 | Campylobacter virus CPt10             | RU004279            | 4.9e-271 | 44.0 | DNA-directed RNA polymerase subunit                 |
| 86 | Campylobacter virus CP220             | WP_133955757        | 2.1e-5   | 51.8 | elongation factor Tu                                |

|     |                                     |              |          |      |                                                    |
|-----|-------------------------------------|--------------|----------|------|----------------------------------------------------|
| 97  | Candidatus Kaiserbacteria bacterium | AUR83018.1   | 2.2e-26  | 25.9 | PIN domain-like protein                            |
| 99  | Vibrio campbellii                   | WP_029300088 | 4.0e-8   | 49.3 | DUF1653 domain-containing protein                  |
| 103 | Rhizobium phage vB_RleM_P10VF       | AQT28046.1   | 7.7e-44  | 51.1 | Deoxyuridine 5'-triphosphate nucleotidohydrolase   |
| 107 | Vibrio tritonius                    | WP_013554351 | 7.7e-65  | 42.3 | thiamine pyrophosphate-binding protein             |
| 108 | Campylobacter virus IBB35           | WP_039553247 | 0        | 77.2 | ribonucleoside-diphosphate reductase subunit alpha |
| 109 | Campylobacter virus CP220           | KII80920.1   | 1.4e-154 | 70.9 | Ribonucleotide-diphosphate reductase subunit beta  |
| 110 | Campylobacter virus CPt10           | WP_105080778 | 1.1e-13  | 29.1 | phosphoenolpyruvate mutase                         |
| 112 | Campylobacter virus CP220           | WP_129033863 | 1.0e-52  | 38.2 | NAD-dependent epimerase/dehydratase family protein |
| 115 | Klosneuvirus KNV1                   | ASZ78959.1   | 3.7e-26  | 38.1 | Metallophosphatase                                 |
| 117 | Paenibacillus sp. oral taxon 786    | WP_028950958 | 1.1e-20  | 30.8 | exodeoxyribonuclease III                           |
| 128 | Campylobacter virus CPt10           | PWB88064.1   | 3.9e-43  | 42.2 | Phosphodiesterase                                  |
| 136 | Pseudomonas phage Lu11              | PYG50685.1   | 2.3e-6   | 71.4 | FtsH-binding integral membrane protein             |

Table S3. Functionally-annotated ORFs of the genome of phage Va3.

| ORF no. | Best hit organism  | Accession No.  | E value   | Identity(%) | Putative Product                                 |
|---------|--------------------|----------------|-----------|-------------|--------------------------------------------------|
| 2       | Vibrio phage VH7D  | YP_009006096.1 | 0         | 100         | RNA ligase 2                                     |
| 4       | Vibrio phage VaKK3 | YP_009201232.1 | 1.08E-121 | 99.41       | recombination endonuclease VII                   |
| 6       | Vibrio phage VH7D  | YP_009006093.1 | 9.20E-74  | 100         | capsid assembly protein                          |
| 11      | Vibrio phage VH7D  | YP_009006088.1 | 1.81E-177 | 100         | 7-cyano-7-deazaguanine synthase                  |
| 12      | Vibrio phage VH7D  | YP_009006087.1 | 0         | 100         | NADPH-dependent 7-cyano-7-deazaguanine reductase |
| 14      | Vibrio phage VH7D  | YP_009006085.1 | 3.13E-165 | 100         | GTP cyclohydrolase 1                             |



|     |                       |                |           |       |                                                                    |
|-----|-----------------------|----------------|-----------|-------|--------------------------------------------------------------------|
| 15  | Vibrio phage ValKK3   | YP_009201243.1 | 0         | 99.68 | 6-pyruvoyl tetrahydropterin synthase-like protein                  |
| 16  | Vibrio phage ValKK3   | YP_009201244.1 | 4.93E-108 | 100   | deoxycytidylate deaminase                                          |
| 44  | Vibrio phage VH7D     | YP_009006385.1 | 0         | 96.72 | polynucleotide kinase                                              |
| 49  | Vibrio phage VH7D     | YP_009006379.1 | 0         | 100   | RNA ligase                                                         |
| 51  | Vibrio phage phi-ST2  | ALP47342.1     | 0         | 99.88 | DNA polymerase                                                     |
| 54  | Vibrio phage nt-1     | YP_008125278.1 | 1.03E-87  | 99.21 | RegA translational repressor protein                               |
| 55  | Vibrio phage VH7D     | YP_009006373.1 | 5.94E-117 | 100   | polymerase accessory protein 62                                    |
| 56  | Vibrio phage VH7D     | YP_009006372.1 | 0         | 100   | DNA polymerase accessory protein 44                                |
| 57  | Vibrio phage VH7D     | YP_009006371.1 | 2.96E-159 | 100   | DNA polymerase processivity component                              |
| 60  | Vibrio phage phi-Grn1 | ALP46964.1     | 0         | 99.87 | recombination-related endonuclease                                 |
| 62  | Vibrio phage VH7D     | YP_009006366.1 | 0         | 100   | exonuclease subunit 1                                              |
| 63  | Vibrio phage VH7D     | YP_009006365.1 | 2.63E-122 | 100   | putative 5'(3')-deoxyribonucleotidase                              |
| 70  | Vibrio phage VH7D     | YP_009006358.1 | 3.66E-125 | 100   | RNA polymerase sigma factor                                        |
| 71  | Vibrio phage ValKK3   | YP_009201301.1 | 0         | 100   | head vertex protein                                                |
| 72  | Vibrio phage ValKK3   | YP_009201302.1 | 6.50E-53  | 100   | glutaredoxin                                                       |
| 75  | Vibrio phage ValKK3   | YP_009201305.1 | 0         | 99.45 | RNA polymerase-ADP-ribosyltransferase                              |
| 77  | Vibrio phage phi-Grn1 | ALP46988.1     | 0         | 99.78 | DNA ligase                                                         |
| 91  | Vibrio phage VH7D     | YP_009006338.1 | 0         | 100   | DNA topoisomerase large subunit                                    |
| 92  | Vibrio phage VH7D     | YP_009006337.1 | 0         | 99.61 | NAD-dependent deacetylase                                          |
| 104 | Vibrio phage VH7D     | YP_009006325.1 | 0         | 100   | thymidylate synthase                                               |
| 112 | Vibrio phage phi-ST2  | ALP47434.1     | 2.21E-171 | 100   | exonuclease A                                                      |
| 114 | Vibrio phage phi-ST2  | ALP47489.1     | 3.4E-115  | 100   | deoxyuridine 5'-triphosphate nucleotidohydrolase                   |
| 115 | Vibrio phage ValKK3   | YP_009201345.1 | 0         | 100   | DNA primase subunit                                                |
| 120 | Vibrio phage VH7D     | YP_009006309.1 | 5.04E-114 | 99.37 | anaerobic ribonucleoside-triphosphate reductase-activating protein |
| 123 | Vibrio phage phi-Grn1 | ALP46970.1     | 0         | 100   | ribonucleoside-triphosphate reductase                              |

|     |                       |                |           |       |                                                               |
|-----|-----------------------|----------------|-----------|-------|---------------------------------------------------------------|
| 124 | Vibrio phage ValKK3   | YP_009201354.1 | 1.41E-51  | 98.77 | hypothetical protein                                          |
| 125 | Vibrio phage ValKK3   | YP_009201355.1 | 0         | 100   | DNA primase-helicase subunit                                  |
| 127 | Vibrio phage VH7D     | YP_009006302.1 | 0         | 100   | recombination and repair protein                              |
| 128 | Vibrio phage VH7D     | YP_009006301.1 | 3.23E-178 | 100   | ATP-dependent Clp protease proteolytic subunit 2              |
| 129 | Vibrio phage ValKK3   | YP_009201359.1 | 3.18E-132 | 100   | dihydrofolate reductase                                       |
| 130 | Vibrio phage phi-Grn1 | ALP47019.1     | 0         | 100   | single stranded DNA-binding protein                           |
| 131 | Vibrio phage ValKK3   | YP_009201361.1 | 4.97E-134 | 99.46 | loader of DNA helicase                                        |
| 132 | Vibrio phage phi-Grn1 | ALP47199.1     | 3.43E-68  | 100   | transcriptional regulator                                     |
| 133 | Vibrio phage VH7D     | YP_009006296.1 | 1.22E-59  | 100   | double-stranded DNA-binding protein                           |
| 134 | Vibrio phage VH7D     | YP_009006295.1 | 0         | 100   | ribonuclease H                                                |
| 135 | Vibrio phage phi-ST2  | ALP47338.1     | 0         | 99.76 | short tail fiber protein                                      |
| 136 | Vibrio phage phi-ST2  | ALP47341.1     | 0         | 97.99 | tail connector protein                                        |
| 137 | Vibrio phage ValKK3   | YP_009201367.1 | 3.38E-95  | 100   | recombination, repair and single-stranded DNA binding protein |
| 142 | Vibrio phage VH7D     | YP_009006294.1 | 0         | 100   | ATP-dependent DNA helicase                                    |
| 152 | Vibrio phage ValKK3   | YP_009201382.1 | 9.43E-110 | 96.97 | prohead protease inhibitor                                    |
| 153 | Vibrio phage KVP40    | NP_899611.1    | 0         | 86.78 | hypothetical protein KVP40.0366                               |
| 154 | Vibriophage phi-pp2   | AFN37597.1     | 1.96E-76  | 95.58 | hypothetical protein pp2_365                                  |
| 155 | Vibrio phage phi-Grn1 | ALP47001.1     | 0         | 96.71 | tRNA nucleotidyltransferase                                   |
| 156 | Vibrio phage ValKK3   | YP_009201384.1 | 0         | 99.81 | major capsid protein precursor                                |
| 157 | Vibrio phage VH7D     | YP_009006290.1 | 0         | 100   | major prohead-scaffolding core protein                        |
| 158 | Vibrio phage VH7D     | YP_009006289.1 | 7.42E-154 | 100   | prohead core protein protease                                 |
| 159 | Vibrio phage VH7D     | YP_009006288.1 | 2.35E-109 | 100   | prohead core protein protease                                 |
| 161 | Vibrio phage VH7D     | YP_009006286.1 | 0         | 100   | structural protein of head                                    |
| 162 | Vibrio phage VH7D     | YP_009006285.1 | 8.72E-121 | 100   | tail tube protein                                             |
| 163 | Vibrio phage VH7D     | YP_009006284.1 | 0         | 99.85 | tail sheath protein                                           |

|     |                       |                |           |       |                                      |
|-----|-----------------------|----------------|-----------|-------|--------------------------------------|
| 164 | Vibrio phage ValKK3   | YP_009201392.1 | 0         | 100   | large terminase protein              |
| 165 | Vibrio phage VH7D     | YP_009006282.1 | 7.86E-130 | 100   | DNA-packaging protein                |
| 167 | Vibrio phage phi-Grn1 | ALP47013.1     | 0         | 99.69 | tail assembly protein                |
| 168 | Vibrio phage VH7D     | YP_009006279.1 | 0         | 100   | neck protein                         |
| 169 | Vibrio phage VH7D     | YP_009006278.1 | 0         | 100   | neck protein                         |
| 170 | Vibrio phage VH7D     | YP_009006277.1 | 0         | 99.29 | fibrin                               |
| 171 | Vibrio phage VH7D     | YP_009006276.1 | 0         | 99.79 | short tail fiber protein             |
| 174 | Vibrio phage VH7D     | YP_009006273.1 | 0         | 100   | baseplate structural protein         |
| 175 | Vibrio phage VH7D     | YP_009006272.1 | 0         | 99.69 | baseplate structural protein         |
| 176 | Vibrio phage phi-ST2  | ALP47388.1     | 0         | 99.71 | baseplate wedge subunit              |
| 177 | Vibrio phage phi-ST2  | ALP47339.1     | 0         | 99.74 | baseplate wedge subunit              |
| 178 | Vibrio phage VH7D     | YP_009006269.1 | 0         | 100   | baseplate structural protein         |
| 179 | Vibrio phage VH7D     | YP_009006268.1 | 9.61E-97  | 100   | tail lysozyme                        |
| 182 | Vibrio phage phi-Grn1 | ALP47208.1     | 6.22E-63  | 98.98 | putative phospholipase               |
| 184 | Vibrio phage VH7D     | YP_009006265.1 | 0         | 99.51 | tail-associated lysozyme             |
| 186 | Vibrio phage VH7D     | YP_009006263.1 | 9.68E-140 | 100   | baseplate structural protein         |
| 187 | Vibrio phage VH7D     | YP_009006262.1 | 0         | 100   | tail-tube assembly protein           |
| 188 | Vibrio phage ValKK3   | YP_009201416.1 | 1.77E-108 | 100   | head completion protein              |
| 189 | Vibrio phage ValKK3   | YP_009201417.1 | 2.00E-145 | 100   | DNA end protector protein            |
| 190 | Vibrio phage ValKK3   | YP_009201418.1 | 0         | 100   | baseplate-tail tube initiator        |
| 194 | Vibrio phage phi-Grn1 | ALP47091.1     | 8.21E-131 | 100   | tail completion protein              |
| 195 | Vibrio phage phi-Grn1 | ALP47061.1     | 5.09E-156 | 100   | deoxynucleotide monophosphate kinase |
| 217 | Vibrio phage ValKK3   | YP_009201449.1 | 0         | 96.09 | tail fiber                           |
| 219 | Vibrio phage ValKK3   | YP_009201451.1 | 0         | 78.66 | long tail fiber distal subunit       |
| 220 | Vibrio phage phi-ST2  | ALP47337.1     | 0         | 92.44 | tail fibers protein                  |
| 227 | Vibrio phage VH7D     | YP_009006252.1 | 3.62E-173 | 100   | PhoH-like protein                    |

|     |                       |                |           |       |                                                                                        |
|-----|-----------------------|----------------|-----------|-------|----------------------------------------------------------------------------------------|
| 237 | Vibrio phage VH7D     | YP_009006242.1 | 0         | 100   | DNA topoisomerase medium subunit                                                       |
| 238 | Vibrio phage phi-Grn1 | ALP47011.1     | 0         | 100   | thioredoxin                                                                            |
| 241 | Vibrio phage VH7D     | YP_009006238.1 | 1.88E-65  | 98.99 | glutaredoxin                                                                           |
| 242 | Vibrio phage VH7D     | YP_009006237.1 | 0         | 100   | ribonucleoside-diphosphate reductase 1 subunit beta                                    |
| 243 | Vibrio phage VH7D     | YP_009006236.1 | 0         | 100   | ribonucleoside-diphosphate reductase subunit alpha                                     |
| 252 | Vibrio phage VH7D     | YP_009006228.1 | 0         | 99.6  | nicotinamide phosphoribosyl transferase                                                |
| 291 | Vibrio phage ValKK3   | YP_009201132.1 | 2.54E-161 | 98.66 | nicotinamide riboside transporter                                                      |
| 295 | Vibrio phage ValKK3   | YP_009201136.1 | 0         | 98.77 | trifunctional NAD biosynthesis/regulator protein                                       |
| 302 | Vibrio phage ValKK3   | YP_009201143.1 | 6.09E-99  | 97.86 | endonuclease V                                                                         |
| 323 | Vibrio phage VH7D     | YP_009006157.1 | 8.21E-140 | 100   | thymidine kinase                                                                       |
| 357 | Vibrio phage phi-ST2  | ALP47387.1     | 0         | 99.41 | nicotinamide-nucleotide adenylyltransferase NadM family/<br>ADP-ribose pyrophosphatase |
| 363 | Vibrio phage VH7D     | YP_009006117.1 | 0         | 99.76 | ATP-dependent DNA helicase                                                             |
| 372 | Vibrio phage ValKK3   | YP_009201217.1 | 8.43E-165 | 98.24 | potassium voltage-gated channel subfamily A member 1<br>protein                        |
| 375 | Vibrio phage VH7D     | YP_009006106.1 | 0         | 100   | protein rIIB                                                                           |
| 376 | Vibrio phage VH7D     | YP_009006105.1 | 0         | 100   | protein rIIA                                                                           |

Table S4. Host range of phages cocktails against 15 *Vibrio* sp. isolates

| Strain         | Most closely related strain | Origin               | Va1+Va2 | Va1+Va3 | Va2+Va3 | Va1+Va2+Va3 |
|----------------|-----------------------------|----------------------|---------|---------|---------|-------------|
| VIB283         | <i>Vibrio alginolyticus</i> | Donated <sup>#</sup> | +       | +       | +       | +           |
| LMG 19158(T)   | <i>Vibrio scophthalmi</i>   | Collection           | +       | +       | +       | +           |
| NBRC 104587(T) | <i>Vibrio azureus</i>       | Collection           | +       | +       | +       | +           |
| VIB 283 R      | <i>Vibrio alginolyticus</i> | Collection           | -       | +       | +       | +           |

|               |                               |                      |   |   |   |   |
|---------------|-------------------------------|----------------------|---|---|---|---|
| NBRC15630(T)  | <i>Vibrio alginolyticus</i>   | Collection           | - | + | + | + |
| CAIM 1831(T)  | <i>Vibrio alfacensis</i>      | Collection           | - | - | - | - |
| CAIM 25(T)    | <i>Vibrio gigantis</i>        | Collection           | - | - | - | - |
| E20121(T)     | <i>Vibrio zhuhaiensis</i>     | Collection           | - | - | - | - |
| Vb 11.11(T)   | <i>Vibrio atlanticus</i>      | Collection           | - | - | - | - |
| E20121(T)     | <i>Vibrio zhuhaiensis</i>     | Collection           | - | - | - | - |
| R-3712(T)     | <i>Vibrio chagasii</i>        | Collection           | - | - | - | - |
| 18            | <i>Vibrio campbellii</i>      | Donated*             | - | - | - | - |
| 20160303005-1 | <i>Vibrio parahemolyticus</i> | Donated*             | - | - | - | - |
| VIB 72        | <i>Vibrio anguillarum</i>     | Donated <sup>#</sup> | - | - | - | - |
| VIB 645       | <i>Vibrio harveyi</i>         | Donated <sup>#</sup> | - | - | - | - |

Table S5. Results of one-way ANOVA on the OD600 of *V. alginolyticus* 283T treated with different phages at MOI=1, and of a *posteriori* pairwise multiple comparisons for the OD600 of *V. alginolyticus* 283T (Student's t-test).

| <b>Sources of variation</b>                    | <b>P</b> |
|------------------------------------------------|----------|
| Factor (OD600 of <i>V. alginolyticus</i> 283T) | < 0.001  |
| <b>A posteriori pairwise comparisons</b>       | <b>P</b> |
| Control vs. Va1                                | < 0.001  |
| Control vs. Va2                                | < 0.001  |
| Control vs. Va3                                | < 0.001  |

|            |       |
|------------|-------|
| Va1 vs.Va2 | 0.155 |
| Va2 vs.Va3 | 0.148 |
| Va1vs.Va3  | 0.675 |

Table S6. Results of one-way ANOVA on the OD600 of *V. alginolyticus* 283T treated with different phage cocktails at MOI=1, and of a *posteriori* pairwise multiple comparisons for the OD600 of *V. alginolyticus* 283T (Student's t-test).

| <b>Sources of variation</b>                     | <b>P</b> |
|-------------------------------------------------|----------|
| Factor (number of <i>V. alginolyticus</i> 283T) | < 0.001  |
| <b><i>A posteriori</i> pairwise comparisons</b> |          |
| Control vs. Va1/Va2                             | < 0.001  |
| Control vs. Va2/Va3                             | < 0.001  |
| Control vs. Va1/Va3                             | < 0.001  |
| Control vs. Va1//Va2/Va3                        | < 0.001  |
| Va1/Va2 vs.Va2/Va3                              | < 0.001  |
| Va1/Va2 vs.Va1/Va3                              | < 0.001  |
| Va1/Va2 vs.Va1//Va2/Va3                         | < 0.001  |
| Va2/Va3 vs.Va1/Va3                              | < 0.001  |
| Va2/Va3 vs.Va1//Va2/Va3                         | < 0.001  |
| Va1/Va3 vs.Va1//Va2/Va3                         | < 0.001  |

Table S7. Results of one-way ANOVA on the number of *V. alginolyticus* 283T treated with different phage cocktails at MOI=1, and of a *posteriori* pairwise multiple comparisons for the number of *V. alginolyticus* 283T (Student's t-test).

| <b>Sources of variation</b> | <b>P</b> |
|-----------------------------|----------|
|-----------------------------|----------|

| Factor (number of <i>V. alginolyticus</i> 283T) | P       |
|-------------------------------------------------|---------|
| <b><i>A posteriori</i> pairwise comparisons</b> |         |
| Control vs. Va1/Va2                             | < 0.001 |
| Control vs. Va2/Va3                             | < 0.001 |
| Control vs. Va1/Va3                             | < 0.001 |
| Control vs. Va1//Va2/Va3                        | < 0.001 |
| Va1/Va2 vs. Va2/Va3                             | < 0.001 |
| Va1/Va2 vs. Va1/Va3                             | < 0.001 |
| Va1/Va2 vs. Va1//Va2/Va3                        | < 0.001 |
| Va2/Va3 vs. Va1/Va3                             | < 0.001 |
| Va2/Va3 vs. Va1//Va2/Va3                        | < 0.001 |
| Va1/Va3 vs. Va1//Va2/Va3                        | < 0.001 |

Table S8. Results of one-way ANOVA on the OD600 of *V. alginolyticus* 283T treated with different phages at MOI=10, and of a *posteriori* pairwise multiple comparisons for the OD600 of *V. alginolyticus* 283T (Student's t-test).

| Sources of variation                            | P       |
|-------------------------------------------------|---------|
| Factor (OD600 of <i>V. alginolyticus</i> 283T)  | < 0.001 |
| <b><i>A posteriori</i> pairwise comparisons</b> |         |
| Control vs. Va1                                 | < 0.001 |
| Control vs. Va2                                 | < 0.001 |
| Control vs. Va3                                 | < 0.001 |
| Va1 vs. Va2                                     | < 0.001 |
| Va2 vs. Va3                                     | 0.007   |

|             |       |
|-------------|-------|
| Va1 vs. Va3 | 0.244 |
|-------------|-------|

Table S9. Results of one-way ANOVA on the OD600 of *V. alginolyticus* 283T treated with different phage cocktails at MOI=10, and of a *posteriori* pairwise multiple comparisons for the OD600 of *V. alginolyticus* 283T (Student's t-test).

| <b>Sources of variation</b>                     | <b>P</b> |
|-------------------------------------------------|----------|
| Factor (number of <i>V. alginolyticus</i> 283T) | < 0.001  |
| <b><i>A posteriori</i> pairwise comparisons</b> |          |
| Control vs. Va1/Va2                             | < 0.001  |
| Control vs. Va2/Va3                             | < 0.001  |
| Control vs. Va1/Va3                             | < 0.001  |
| Control vs. Va1//Va2/Va3                        | < 0.001  |
| Va1/Va2 vs. Va2/Va3                             | < 0.001  |
| Va1/Va2 vs. Va1/Va3                             | < 0.001  |
| Va1/Va2 vs. Va1//Va2/Va3                        | < 0.001  |
| Va2/Va3 vs. Va1/Va3                             | < 0.001  |
| Va2/Va3 vs. Va1//Va2/Va3                        | < 0.001  |
| Va1/Va3 vs. Va1//Va2/Va3                        | < 0.001  |

Table S10. Results of one-way ANOVA on the OD600 of *Vibrio parahaemolyticus* MCS treated with different phages at MOI=1, and of a *posteriori* pairwise multiple comparisons for the OD600 of *Vibrio parahaemolyticus* MCS (Student's t-test).

| <b>Sources of variation</b>                          | <b>P</b> |
|------------------------------------------------------|----------|
| Factor (OD600 of <i>Vibrio parahaemolyticus</i> MCS) | < 0.001  |
| <b><i>A posteriori</i> pairwise comparisons</b>      |          |



|                     |         |
|---------------------|---------|
| Control vs. VP1+VP2 | < 0.001 |
| Control vs. VP2+VP4 | < 0.001 |
| Control vs. VP3+VP4 | < 0.001 |
| Control vs. VP1+VP4 | 0.02    |
| Control vs. VP2+VP3 | 0.008   |
| Control vs. VP1+VP3 | 0.004   |
| VP1+VP2 vs.VP2+VP4  | < 0.001 |
| VP1+VP2 vs.VP3+VP4  | 0.02    |
| VP1+VP2 vs.VP3+VP4  | < 0.001 |
| VP1+VP2vs.VP2+VP3   | 0.298   |
| VP1+VP2vs.VP1+VP3   | 0.596   |
| VP2+VP4vs.VP3+VP4   | 0.669   |
| VP2+VP4vs.VP1+VP4   | 0.906   |
| VP2+VP4vs.VP2+VP3   | 0.001   |
| VP2+VP4vs.VP1+VP3   | 0.005   |
| VP3+VP4vs.VP1+VP4   | 0.608   |
| VP3+VP4vs.VP2+VP3   | 0.012   |
| VP3+VP4vs.VP1+VP3   | 0.031   |
| VP1+VP4vs.VP2+VP3   | 0.002   |
| VP1+VP4vs.VP1+VP3   | 0.006   |
| VP2+VP3vs.VP1+VP3   | 0.548   |

Table S11. Results of one-way ANOVA on the OD600 of *Vibrio parahaemolyticus* MCS treated with different phages at MOI=10, and of a *posteriori* pairwise multiple comparisons for the OD600 of *Vibrio parahaemolyticus* MCS (Student's t-test).

| Sources of variation | P |
|----------------------|---|
|----------------------|---|

|                                                      |          |
|------------------------------------------------------|----------|
| Factor (OD600 of <i>Vibrio parahaemolyticus</i> MCS) | < 0.001  |
| <b><i>A posteriori</i> pairwise comparisons</b>      | <b>P</b> |
| Control vs. VP1+VP2                                  | < 0.001  |
| Control vs. VP2+VP4                                  | < 0.001  |
| Control vs. VP3+VP4                                  | < 0.001  |
| Control vs. VP1+VP4                                  | 0.02     |
| Control vs. VP2+VP3                                  | 0.001    |
| Control vs. VP1+VP3                                  | < 0.001  |
| VP1+VP2 vs. VP2+VP4                                  | < 0.001  |
| VP1+VP2 vs. VP3+VP4                                  | 0.02     |
| VP1+VP2 vs. VP3+VP4                                  | < 0.001  |
| VP1+VP2 vs. VP2+VP3                                  | 0.372    |
| VP1+VP2 vs. VP1+VP3                                  | 0.994    |
| VP2+VP4 vs. VP3+VP4                                  | 0.642    |
| VP2+VP4 vs. VP1+VP4                                  | 0.321    |
| VP2+VP4 vs. VP2+VP3                                  | < 0.001  |
| VP2+VP4 vs. VP1+VP3                                  | < 0.001  |
| VP3+VP4 vs. VP1+VP4                                  | 0.167    |
| VP3+VP4 vs. VP2+VP3                                  | < 0.001  |
| VP3+VP4 vs. VP1+VP3                                  | < 0.001  |
| VP1+VP4 vs. VP2+VP3                                  | < 0.001  |
| VP1+VP4 vs. VP1+VP3                                  | < 0.001  |
| VP2+VP3 vs. VP1+VP3                                  | 0.341    |
